# Supplementary material for: Screening and Identification of Anti-Inflammatory Compounds from Erdong Gao via Multiple-Target-Cell Extraction Coupled with HPLC-Q-TOF-MS/MS and Their Structure–Activity Relationship
Source: MDPI journal article supplement (doi:10.3390/molecules28010295), 2022-12-30
Supplement: s1 [file s1]

**Table S1.** HPLC–MS/MS data in the negative ion mode of identified in EDG

| No. | t <sub>R</sub><br>(min) | Identification                    | [M-H] <sup>-</sup><br>m/z | Formula                                         | Diff<br>(ppm) | Fragment ions in the negative mode<br>with the energy 50V CID                                                                                                                                                                                                                    |
|-----|-------------------------|-----------------------------------|---------------------------|-------------------------------------------------|---------------|----------------------------------------------------------------------------------------------------------------------------------------------------------------------------------------------------------------------------------------------------------------------------------|
| 1   | 6.809                   | unknown                           | 447.1559                  | C <sub>30</sub> H <sub>24</sub> O <sub>4</sub>  | 9.56          | 447.1559, 388.1991, 285.1149,<br>225.0921, 165.0562, 119.0503                                                                                                                                                                                                                    |
| 2   | 8.531                   | unknown                           | 489.1621                  | C <sub>21</sub> H <sub>30</sub> O <sub>13</sub> | -1.50         | 489.1621, 397.8348, 325.7311,<br>257.5429, 165.0581, 119.0182                                                                                                                                                                                                                    |
| 3   | 9.037                   | phenethanol- $\beta$ -vicianoside | 415.1628                  | C <sub>19</sub> H <sub>28</sub> O <sub>10</sub> | 1.80          | [M-H] <sup>-</sup> 415.1628<br>[M-H-glc] <sup>-</sup> 253.1944                                                                                                                                                                                                                   |
| 4   | 20.189                  | unknown                           | 285.1148                  | C <sub>17</sub> H <sub>18</sub> O <sub>4</sub>  | -5.48         | 285.1148, 267.1865, 255.0963,<br>183.0654, 155.8184, 119.0494                                                                                                                                                                                                                    |
| 5   | 21.775                  | Ophiofurospiside I                | 1079.5309                 | C <sub>47</sub> H <sub>84</sub> O <sub>27</sub> | -3.03         | [M-H] <sup>-</sup> 1079.5309<br>[M-H-glc] <sup>-</sup> 917.4634<br>[M-H-glc-rha] <sup>-</sup> 771.4176<br>[M-H-glc-rha-H <sub>2</sub> O] <sup>-</sup> 753.4068<br>[M-H-2glc-rha-H <sub>2</sub> O] <sup>-</sup> 591.3511<br>[M-H-3glc-rha-H <sub>2</sub> O] <sup>-</sup> 429.3023 |

|   |        |                                                                                                                                               |           |                                                 |       |                                                       |
|---|--------|-----------------------------------------------------------------------------------------------------------------------------------------------|-----------|-------------------------------------------------|-------|-------------------------------------------------------|
| 6 | 22.113 | Ophiopogonin L                                                                                                                                | 1065.5123 | C <sub>50</sub> H <sub>82</sub> O <sub>24</sub> | -2.88 | [M-H] <sup>-</sup> 1065.5123                          |
|   |        |                                                                                                                                               |           |                                                 |       | [M-H-xyl] <sup>-</sup> 933.4681                       |
|   |        |                                                                                                                                               |           |                                                 |       | [M-H-glc] <sup>-</sup> 903.4547                       |
|   |        |                                                                                                                                               |           |                                                 |       | [M-H-xyl-glc] <sup>-</sup> 771.4294                   |
|   |        |                                                                                                                                               |           |                                                 |       | [M-H-xyl-glc-H <sub>2</sub> O] <sup>-</sup> 753.4184  |
| 7 | 22.383 | Asparoside A                                                                                                                                  | 1079.5212 | C <sub>51</sub> H <sub>84</sub> O <sub>24</sub> | 2.55  | [M-H] <sup>-</sup> 1079.5212                          |
|   |        |                                                                                                                                               |           |                                                 |       | [M-H-glc] <sup>-</sup> 917.4739                       |
|   |        |                                                                                                                                               |           |                                                 |       | [M-H-glc-rha] <sup>-</sup> 771.4256;                  |
|   |        |                                                                                                                                               |           |                                                 |       | [M-H-glc-rha-H <sub>2</sub> O] <sup>-</sup> 753.3938  |
| 8 | 23.160 | (25 <i>S</i> )-26- <i>O</i> -β-D-glucopyranosyl-5β-furostane-3β,26-diol-22α-methoxy-3- <i>O</i> -β-D-glucopyranosyl-(1→2)-β-D-glucopyranoside | 979.4647  | C <sub>45</sub> H <sub>74</sub> O <sub>20</sub> | 1.61  | [M-H+COOH] <sup>-</sup> 979.4734                      |
|   |        |                                                                                                                                               |           |                                                 |       | [M-H] <sup>-</sup> 933.4699                           |
|   |        |                                                                                                                                               |           |                                                 |       | [M-H-glc] <sup>-</sup> 771.4183                       |
|   |        |                                                                                                                                               |           |                                                 |       | [M-H-glc-H <sub>2</sub> O] <sup>-</sup> 753.4096      |
|   |        |                                                                                                                                               |           |                                                 |       | [M-H-2glc-H <sub>2</sub> O] <sup>-</sup> 591.3396     |
|   |        |                                                                                                                                               |           |                                                 |       | [M-H-3glc-H <sub>2</sub> O] <sup>-</sup> 429.3081     |
| 9 | 23.396 | Ophiofurospiside F                                                                                                                            | 979.4697  | C <sub>45</sub> H <sub>74</sub> O <sub>20</sub> | 1.36  | [M-H] <sup>-</sup> 933.4641                           |
|   |        |                                                                                                                                               |           |                                                 |       | [M-H-rha] <sup>-</sup> 787.4066                       |
|   |        |                                                                                                                                               |           |                                                 |       | [M-H-rha-H <sub>2</sub> O] <sup>-</sup> 769.3870      |
|   |        |                                                                                                                                               |           |                                                 |       | [M-H-rha-glc-H <sub>2</sub> O] <sup>-</sup> 607.3527  |
|   |        |                                                                                                                                               |           |                                                 |       | [M-H-rha-2glc-H <sub>2</sub> O] <sup>-</sup> 445.3106 |

|    |        |                                                                                                                                                                                                                                                   |           |                                                 |       |                                                          |
|----|--------|---------------------------------------------------------------------------------------------------------------------------------------------------------------------------------------------------------------------------------------------------|-----------|-------------------------------------------------|-------|----------------------------------------------------------|
| 10 | 26.291 | Ophiopigonin K                                                                                                                                                                                                                                    | 1095.5263 | C <sub>51</sub> H <sub>84</sub> O <sub>25</sub> | -3.11 | [M-H] <sup>-</sup> 1095.5263                             |
|    |        |                                                                                                                                                                                                                                                   |           |                                                 |       | [M-H-H <sub>2</sub> O] <sup>-</sup> 1077.4950            |
|    |        |                                                                                                                                                                                                                                                   |           |                                                 |       | [M-H-H <sub>2</sub> O-glc] <sup>-</sup> 915.4415         |
|    |        |                                                                                                                                                                                                                                                   |           |                                                 |       | [M-H-H <sub>2</sub> O-2glc] <sup>-</sup> 753.3695        |
|    |        |                                                                                                                                                                                                                                                   |           |                                                 |       | [M-H-H <sub>2</sub> O-2glc-rha] <sup>-</sup> 607.5663    |
| 11 | 27.506 | (25 <i>S</i> )-26- <i>O</i> - $\beta$ -D-glucopyranosyl-5 $\beta$ -furostane-5,20-diene-3 $\beta$ ,26-diol-3- <i>O</i> - $\alpha$ -L-rhamnopyranosyl(1 $\rightarrow$ 4)- $\beta$ -D-glucopyranoside                                               | 1061.5294 | C <sub>54</sub> H <sub>78</sub> O <sub>21</sub> | -4.72 | [M-H] <sup>-</sup> 1061.5294                             |
|    |        |                                                                                                                                                                                                                                                   |           |                                                 |       | [M-H-rha] <sup>-</sup> 915.4752                          |
|    |        |                                                                                                                                                                                                                                                   |           |                                                 |       | [M-H-rha-H <sub>2</sub> O] <sup>-</sup> 897.4363         |
|    |        |                                                                                                                                                                                                                                                   |           |                                                 |       | [M-H-2rha-H <sub>2</sub> O] <sup>-</sup> 751.4153        |
|    |        |                                                                                                                                                                                                                                                   |           |                                                 |       | [M-H-2rha-glc-H <sub>2</sub> O] <sup>-</sup> 589.3372    |
| 12 | 28.148 | (25 <i>S</i> )-26- <i>O</i> - $\beta$ -D-glucopyranosyl-5 $\beta$ -furostane-22methoxy,3 $\beta$ ,26-diol-3- <i>O</i> -[ $\alpha$ -L-rhamnopyranosyl(1 $\rightarrow$ 2)- $\beta$ -D-xylopyranosyl(1 $\rightarrow$ 4)]- $\beta$ -D-glucopyranoside | 1047.4923 | C <sub>51</sub> H <sub>84</sub> O <sub>22</sub> | -7.52 | [M-H] <sup>-</sup> 1047.4923                             |
|    |        |                                                                                                                                                                                                                                                   |           |                                                 |       | [M-H-xyl] <sup>-</sup> 915.4539                          |
|    |        |                                                                                                                                                                                                                                                   |           |                                                 |       | [M-H-xyl-rha] <sup>-</sup> 769.4610                      |
|    |        |                                                                                                                                                                                                                                                   |           |                                                 |       | [M-H-xyl-rha-H <sub>2</sub> O] <sup>-</sup> 751.3687     |
|    |        |                                                                                                                                                                                                                                                   |           |                                                 |       | [M-H-xyl-rha-glc-H <sub>2</sub> O] <sup>-</sup> 589.3231 |
| 13 | 28.621 | (25 <i>S</i> )-26- <i>O</i> - $\beta$ -D-glucopyranosyl-5 $\beta$ -furostane-22methoxy,3 $\beta$ ,26-diol-3- <i>O</i> - $\alpha$ -L-rhamnopyranosyl (1 $\rightarrow$ 6)- $\beta$ -D-glucopyranoside                                               | 915.4535  | C <sub>46</sub> H <sub>76</sub> O <sub>18</sub> | -1.11 | [M-H] <sup>-</sup> 915.4535                              |
|    |        |                                                                                                                                                                                                                                                   |           |                                                 |       | [M-H-H <sub>2</sub> O] <sup>-</sup> 897.4897             |
|    |        |                                                                                                                                                                                                                                                   |           |                                                 |       | [M-H-rha-H <sub>2</sub> O] <sup>-</sup> 751.4037         |
|    |        |                                                                                                                                                                                                                                                   |           |                                                 |       | [M-H-rha-glc-H <sub>2</sub> O] <sup>-</sup> 589.3420     |

|    |        |                                                                                                                                                            |           |                                                 |       |                                                                                                                                                                                                                                                                                                             |
|----|--------|------------------------------------------------------------------------------------------------------------------------------------------------------------|-----------|-------------------------------------------------|-------|-------------------------------------------------------------------------------------------------------------------------------------------------------------------------------------------------------------------------------------------------------------------------------------------------------------|
| 14 | 28.891 | Ophiofurospiside J                                                                                                                                         | 917.4702  | C <sub>45</sub> H <sub>74</sub> O <sub>19</sub> | 0.94  | [M-H] <sup>-</sup> 917.4702<br>[M-H-glc] <sup>-</sup> 755.4252<br>[M-H-2glc] <sup>-</sup> 593.3525<br>[M-H-3glc] <sup>-</sup> 431.4809<br>[M-H] <sup>-</sup> 1211.5714<br>[M-H-glc] <sup>-</sup> 1049.4913<br>[M-H-glc-xyl] <sup>-</sup> 917.4761                                                           |
| 15 | 29.228 | Ophiofurospiside C                                                                                                                                         | 1211.5714 | C <sub>56</sub> H <sub>92</sub> O <sub>28</sub> | -0.96 | [M-H-glc-xyl-H <sub>2</sub> O] <sup>-</sup> 899.4725<br>[M-H-glc-xyl-rha-H <sub>2</sub> O] <sup>-</sup> 753.1404<br>[M-H-2glc-xyl-rha-H <sub>2</sub> O] <sup>-</sup> 591.4125<br>[M-H-3glc-xyl-rha-H <sub>2</sub> O] <sup>-</sup> 429.5175                                                                  |
| 16 | 29.600 | (25 <i>R</i> )-26- <i>O</i> -β-D-glucopyranosyl(1→6)-furost-5ene-3β,17α,22α,26-tetrol-3- <i>O</i> -α-L-rhamnopyranosyl (1→2)- <i>O</i> -β-D-glucopyranosyl | 1079.5309 | C <sub>51</sub> H <sub>84</sub> O <sub>24</sub> | 2.41  | [M-H] <sup>-</sup> 1079.5309<br>[M-H-H <sub>2</sub> O] <sup>-</sup> 1061.5044<br>[M-H-H <sub>2</sub> O-glc] <sup>-</sup> 899.4575<br>[M-H-H <sub>2</sub> O-glc-rha] <sup>-</sup> 753.3976<br>[M-H-H <sub>2</sub> O-2glc-rha] <sup>-</sup> 591.3551<br>[M-H-H <sub>2</sub> O-2glc-rha] <sup>-</sup> 429.5311 |
| 17 | 30.309 | ASP VII                                                                                                                                                    | 1049.5170 | C <sub>50</sub> H <sub>82</sub> O <sub>23</sub> | 2.75  | [M-H] <sup>-</sup> 1049.5170;<br>[M-H-xyl] <sup>-</sup> 917.4718<br>[M-H-xyl-rha] <sup>-</sup> 771.4110<br>[M-H-xyl-rha-H <sub>2</sub> O] <sup>-</sup> 753.4409<br>[M-H-xyl-rha-glc-H <sub>2</sub> O] <sup>-</sup> 591.3535<br>[M-H-xyl-rha-2glc-H <sub>2</sub> O] <sup>-</sup> 429.2825                    |

|    |        |                                                                                                                                                    |           |                                                 |       |                                                        |
|----|--------|----------------------------------------------------------------------------------------------------------------------------------------------------|-----------|-------------------------------------------------|-------|--------------------------------------------------------|
|    |        |                                                                                                                                                    |           |                                                 |       | [M-H] <sup>-</sup> 1211.5714                           |
|    |        |                                                                                                                                                    |           |                                                 |       | [M-H-xyl] <sup>-</sup> 1079.5076                       |
|    |        |                                                                                                                                                    |           |                                                 |       | [M-H-rha] <sup>-</sup> 1065.4943                       |
| 18 | 30.781 | Ophiopigoin J                                                                                                                                      | 1211.5714 | C <sub>56</sub> H <sub>92</sub> O <sub>28</sub> | -0.96 | [M-H-glc] <sup>-</sup> 1049.4982                       |
|    |        |                                                                                                                                                    |           |                                                 |       | [M-H-xyl-glc] <sup>-</sup> 917.4617                    |
|    |        |                                                                                                                                                    |           |                                                 |       | [M-H-xyl-glc-rha] <sup>-</sup> 771.3982                |
|    |        |                                                                                                                                                    |           |                                                 |       | [M-H-xyl-rha-2glc] <sup>-</sup> 609.3750               |
|    |        |                                                                                                                                                    |           |                                                 |       | [M-H-xyl-rha-3glc] <sup>-</sup> 447.6868               |
|    |        | (25S)-26- <i>O</i> -β-D-glucopyranosyl-5β-furostane-3β,22α,26-triol-12-one-3- <i>O</i> -α-L-rhamnopyranosyl (1→4)-β-D-glucopyranoside              | 917.4763  | C <sub>45</sub> H <sub>74</sub> O <sub>19</sub> | 1.37  | [M-H] <sup>-</sup> 917.4763                            |
| 19 | 31.288 |                                                                                                                                                    |           |                                                 |       | [M-H-rha] <sup>-</sup> 771.4251                        |
|    |        |                                                                                                                                                    |           |                                                 |       | [M-H-rha-H <sub>2</sub> O] <sup>-</sup> 753.4038       |
|    |        |                                                                                                                                                    |           |                                                 |       | [M-H-rha-glc-H <sub>2</sub> O] <sup>-</sup> 591.3599   |
|    |        |                                                                                                                                                    |           |                                                 |       | [M-H-rha-glc-H <sub>2</sub> O] <sup>-</sup> 429.2953   |
|    |        | (25R)-26- <i>O</i> -β-D-glucopyranosyl(1→4)-furost-5ene-3β,17α,22α,26-tetrol-3- <i>O</i> -α-L-rhamnopyranosyl (1→2)- <i>O</i> -β-D-glucopyranoside | 1079.5309 | C <sub>51</sub> H <sub>84</sub> O <sub>24</sub> | 2.5   | [M-H] <sup>-</sup> 1079.5309                           |
| 20 | 31.220 |                                                                                                                                                    |           |                                                 |       | [M-H-glc] <sup>-</sup> 917.4634                        |
|    |        |                                                                                                                                                    |           |                                                 |       | [M-H-glc-rha] <sup>-</sup> 771.4099                    |
|    |        |                                                                                                                                                    |           |                                                 |       | [M-H-glc-rha-H <sub>2</sub> O] <sup>-</sup> 753.3957   |
|    |        |                                                                                                                                                    |           |                                                 |       | [M-H-2glc-rha-H <sub>2</sub> O] <sup>-</sup> 591.3491  |
|    |        |                                                                                                                                                    |           |                                                 |       | [M-H-3glc-rha-H <sub>2</sub> O] <sup>-</sup> 429.3353  |
|    |        |                                                                                                                                                    |           |                                                 |       | [M-H] <sup>-</sup> 933.4633                            |
| 21 | 31.625 | Ophiofurospiside F                                                                                                                                 | 933.4633  | C <sub>45</sub> H <sub>74</sub> O <sub>20</sub> | 1.98  | [M-H-H <sub>2</sub> O] <sup>-</sup> 915.4590           |
|    |        |                                                                                                                                                    |           |                                                 |       | [M-H-2H <sub>2</sub> O] <sup>-</sup> 897.4075          |
|    |        |                                                                                                                                                    |           |                                                 |       | [M-H-rha-2H <sub>2</sub> O] <sup>-</sup> 751.3851      |
|    |        |                                                                                                                                                    |           |                                                 |       | [M-H-rha-glc-2H <sub>2</sub> O] <sup>-</sup> 589.3272  |
|    |        |                                                                                                                                                    |           |                                                 |       | [M-H-rha-2glc-2H <sub>2</sub> O] <sup>-</sup> 427.9021 |

|    |        |                                                       |           |                                                 |      |                                                           |
|----|--------|-------------------------------------------------------|-----------|-------------------------------------------------|------|-----------------------------------------------------------|
| 22 | 31.693 | Ophiopigonin N                                        | 1211.5685 | C <sub>56</sub> H <sub>92</sub> O <sub>28</sub> | 1.43 | [M-H] <sup>-</sup> 1211.5685                              |
|    |        |                                                       |           |                                                 |      | [M-H-xyl] <sup>-</sup> 1079.5112                          |
|    |        |                                                       |           |                                                 |      | [M-H] <sup>-</sup> 1079.5221                              |
|    |        | (25 <i>R</i> )-26- <i>O</i> -β-D-glucopyranosyl(1→6)- |           |                                                 |      | [M-H-glc] <sup>-</sup> 917.4705                           |
| 23 | 32.064 | furost-5ene-3β,17α,22α,26-tetrol-3- <i>O</i> -α-L-    | 1079.5221 | C <sub>51</sub> H <sub>84</sub> O <sub>24</sub> | 3.68 | [M-H-glc-rha] <sup>-</sup> 771.4135                       |
|    |        | rhamnopyranosyl(1→4)- <i>O</i> -β-D-                  |           |                                                 |      | [M-H-glc-rha-H <sub>2</sub> O] <sup>-</sup> 753.4035      |
|    |        | glucopyranoside                                       |           |                                                 |      | [M-H-2glc-rha-H <sub>2</sub> O] <sup>-</sup> 591.3513     |
|    |        |                                                       |           |                                                 |      | [M-H-3glc-rha-H <sub>2</sub> O] <sup>-</sup> 429.2999     |
| 24 | 32.098 | Ophiopogonin K'                                       | 1177.5060 | C <sub>56</sub> H <sub>90</sub> O <sub>26</sub> | 1.05 | [M-H] <sup>-</sup> 1177.5060                              |
|    |        |                                                       |           |                                                 |      | [M-H+COOH] <sup>-</sup> 1095.5263                         |
|    |        |                                                       |           |                                                 |      | [M-H] <sup>-</sup> 1049.5114                              |
|    |        |                                                       |           |                                                 |      | [M-H-rha-H <sub>2</sub> O] <sup>-</sup> 885.4546          |
| 25 | 33.853 | Ophiofurospiside L                                    | 1049.5114 | C <sub>50</sub> H <sub>82</sub> O <sub>23</sub> | 2.87 | [M-H-rha-xyl-H <sub>2</sub> O] <sup>-</sup> 753.3936      |
|    |        |                                                       |           |                                                 |      | [M-H-rha-xyl-glc-H <sub>2</sub> O] <sup>-</sup> 591.2398  |
|    |        |                                                       |           |                                                 |      | [M-H-rha-xyl-2glc-H <sub>2</sub> O] <sup>-</sup> 429.4802 |
|    |        |                                                       |           |                                                 |      | [M-H+COOH] <sup>-</sup> 963.4841                          |
|    |        |                                                       |           |                                                 |      | [M-H] <sup>-</sup> 917.4581                               |
| 26 | 34.326 | Ophiopogonin B                                        | 917.4581  | C <sub>45</sub> H <sub>74</sub> O <sub>19</sub> | 4.64 | [M-H-glc] <sup>-</sup> 755.7322                           |
|    |        |                                                       |           |                                                 |      | [M-H-glc-rha] <sup>-</sup> 609.5523                       |
|    |        |                                                       |           |                                                 |      | [M-H-2glc-rha] <sup>-</sup> 447.2838                      |
|    |        |                                                       |           |                                                 |      | [M-H+COOH] <sup>-</sup> 1095.5263                         |
|    |        |                                                       |           |                                                 |      | [M-H] <sup>-</sup> 1049.5075                              |
|    |        |                                                       |           |                                                 |      | [M-H-xyl] <sup>-</sup> 917.4602                           |
| 27 | 35.305 | Ophioponin I                                          | 1049.5075 | C <sub>50</sub> H <sub>82</sub> O <sub>23</sub> | -3.4 | [M-H-xyl-rha] <sup>-</sup> 771.4091                       |
|    |        |                                                       |           |                                                 |      | [M-H-xyl-rha-glc] <sup>-</sup> 609.3462                   |
|    |        |                                                       |           |                                                 |      | [M-H-xyl-rha-2glc] <sup>-</sup> 447.2930                  |

---

|    |        |                                                                                                                                                                         |           |                                                 |       |                                                       |
|----|--------|-------------------------------------------------------------------------------------------------------------------------------------------------------------------------|-----------|-------------------------------------------------|-------|-------------------------------------------------------|
|    |        |                                                                                                                                                                         |           |                                                 |       | [M-H] <sup>-</sup> 917.4655                           |
|    |        |                                                                                                                                                                         |           |                                                 |       | [M-H-H <sub>2</sub> O] <sup>-</sup> 899.4460          |
| 28 | 35.879 | Ophiofurospiside M                                                                                                                                                      | 917.4655  | C <sub>45</sub> H <sub>74</sub> O <sub>19</sub> | -3.77 | [M-H-rha] <sup>-</sup> 771.4094                       |
|    |        |                                                                                                                                                                         |           |                                                 |       | [M-H-rha-H <sub>2</sub> O] <sup>-</sup> 753.3999      |
|    |        |                                                                                                                                                                         |           |                                                 |       | [M-H-rha-glc-H <sub>2</sub> O] <sup>-</sup> 591.3503  |
|    |        |                                                                                                                                                                         |           |                                                 |       | [M-H-rha-2glc-H <sub>2</sub> O] <sup>-</sup> 429.2931 |
|    |        |                                                                                                                                                                         |           |                                                 |       | [M-H+COOH] <sup>-</sup> 1095.5232                     |
|    |        |                                                                                                                                                                         |           |                                                 |       | [M-H] <sup>-</sup> 1049.5175                          |
| 29 | 36.588 | Ophiofurospiside H                                                                                                                                                      | 1049.5175 | C <sub>50</sub> H <sub>82</sub> O <sub>23</sub> | -0.29 | [M-H-xyl] <sup>-</sup> 917.4774                       |
|    |        |                                                                                                                                                                         |           |                                                 |       | [M-H-xyl] <sup>-</sup> 917.4774                       |
|    |        |                                                                                                                                                                         |           |                                                 |       | [M-H-xyl-rha] <sup>-</sup> 771.2968                   |
| 30 | 36.824 | Ophioponin Q                                                                                                                                                            | 1211.5734 | C <sub>56</sub> H <sub>92</sub> O <sub>28</sub> | -2.61 | [M-H] <sup>-</sup> 1211.5734                          |
|    |        |                                                                                                                                                                         |           |                                                 |       | [M-H-glc] <sup>-</sup> 1049.5128                      |
| 31 | 37.466 | L-borneol-7- <i>O</i> -[ $\beta$ -D-apiofuranosyl-<br>(1 $\rightarrow$ 6)]- $\beta$ -D-glucopyranoside                                                                  | 447.2210  | C <sub>21</sub> H <sub>36</sub> O <sub>10</sub> | -5.69 | [M-H] <sup>-</sup> 447.2210                           |
|    |        |                                                                                                                                                                         |           |                                                 |       | [M-H-glc] <sup>-</sup> 285.5382                       |
| 32 | 39.154 | (22 <i>S</i> )-cholest-5-ene-1 $\beta$ ,3 $\beta$ ,16 $\beta$ ,22-tetraol-<br>1- <i>O</i> - $\alpha$ -L-rhamnopyrnanoside-16- <i>O</i> - $\beta$ -D-<br>glucopyranoside | 741.4370  | C <sub>46</sub> H <sub>62</sub> O <sub>8</sub>  | -2.19 | [M-H] <sup>-</sup> 741.4370                           |
|    |        |                                                                                                                                                                         |           |                                                 |       | [M-H-glc] <sup>-</sup> 579.3829                       |
|    |        |                                                                                                                                                                         |           |                                                 |       | [M-H-glc-rha] <sup>-</sup> 433.3309                   |

---

|    |        |                                                                                                                                                                                                                                                                         |           |                                                 |       |                                                                                                                                                                                                                                                                |
|----|--------|-------------------------------------------------------------------------------------------------------------------------------------------------------------------------------------------------------------------------------------------------------------------------|-----------|-------------------------------------------------|-------|----------------------------------------------------------------------------------------------------------------------------------------------------------------------------------------------------------------------------------------------------------------|
| 33 | 39.289 | Ophiopogonin M                                                                                                                                                                                                                                                          | 1081.5468 | C <sub>50</sub> H <sub>82</sub> O <sub>25</sub> | -2.19 | [M-H] <sup>-</sup> 1081.5468<br>[M-H-glc] <sup>-</sup> 919.5013<br>[M-H-glc-glc] <sup>-</sup> 757.4425                                                                                                                                                         |
| 34 | 40.571 | (25 <i>S</i> )-26- <i>O</i> - $\beta$ -D-glucopyranosyl-5 $\beta$ -furostane-3 $\beta$ ,22 $\alpha$ ,26-triol-3- <i>O</i> - $\beta$ -D-xylopyranosyl(1 $\rightarrow$ 4)-[ $\beta$ -D-glucopyranosyl(1 $\rightarrow$ 2)]- $\beta$ -D-glucopyranoside (Officinalisnin II) | 1051.5341 | C <sub>50</sub> H <sub>84</sub> O <sub>23</sub> | -0.99 | [M-H] <sup>-</sup> 1051.5341;<br>[M-H-xyl] <sup>-</sup> 919.4921;<br>[M-H-xyl-glc] <sup>-</sup> 757.4395;<br>[M-H-xyl-2glc] <sup>-</sup> 595.3751;<br>[M-H-xyl-3glc] <sup>-</sup> 433.3540<br>[M-H] <sup>-</sup> 1051.5384<br>[M-H-xyl] <sup>-</sup> 919.4952; |
| 35 |        | 25- <i>epi</i> -Officinalisnin II                                                                                                                                                                                                                                       | 1051.5384 | C <sub>50</sub> H <sub>84</sub> O <sub>23</sub> | -5.07 | [M-H-xyl-glc] <sup>-</sup> 757.4421<br>[M-H-xyl-2glc] <sup>-</sup> 595.3982<br>[M-H-xyl-3glc] <sup>-</sup> 433.3310                                                                                                                                            |
| 36 | 41.483 | (25 <i>S</i> )-26- <i>O</i> - $\beta$ -D-glucopyranosyl-5 $\beta$ -furostane-3 $\beta$ ,22 $\alpha$ ,26-triol-3- <i>O</i> - $\alpha$ -L-rhamnopyranosyl(1 $\rightarrow$ 4)-[ $\beta$ -D-glucopyranosyl(1 $\rightarrow$ 2)]- $\beta$ -D-glucopyranoside                  | 1065.5491 | C <sub>51</sub> H <sub>86</sub> O <sub>23</sub> | 1.14  | [M-H] <sup>-</sup> 1065.5491<br>[M-H-glc] <sup>-</sup> 903.4978<br>[M-H-glc-rha] <sup>-</sup> 757.4430<br>[M-H-2glc-rha] <sup>-</sup> 595.3887                                                                                                                 |
| 37 | 41.685 | Cixi-ophiopogon B                                                                                                                                                                                                                                                       | 1047.4925 | C <sub>50</sub> H <sub>80</sub> O <sub>23</sub> | -2.63 | [M-H] <sup>-</sup> 1047.4925<br>[M-H-xyl] <sup>-</sup> 915.4497<br>[M-H-xyl-rha] <sup>-</sup> 769.3965<br>[M-H-xyl-rha-glc] <sup>-</sup> 607.3452<br>[M-H-xyl-rha-2glc] <sup>-</sup> 445.4215                                                                  |



|    |        |                                                                                                                                                                   |           |                                                 |       |                                          |
|----|--------|-------------------------------------------------------------------------------------------------------------------------------------------------------------------|-----------|-------------------------------------------------|-------|------------------------------------------|
|    |        |                                                                                                                                                                   |           |                                                 |       | [M-H] <sup>-</sup> 1063.5367             |
|    |        |                                                                                                                                                                   |           |                                                 |       | [M-H-glc] <sup>-</sup> 901.4731          |
| 38 | 42.766 | Ophiopigonin O                                                                                                                                                    | 1063.5367 | C <sub>50</sub> H <sub>80</sub> O <sub>24</sub> | -3.42 | [M-H-glc-gha] <sup>-</sup> 755.4165      |
|    |        |                                                                                                                                                                   |           |                                                 |       | [M-H-2glc-rha] <sup>-</sup> 593.3655     |
|    |        |                                                                                                                                                                   |           |                                                 |       | [M-H-2glc-rha-xyl] <sup>-</sup> 461.3961 |
|    |        |                                                                                                                                                                   |           |                                                 |       | [M-H] <sup>-</sup> 1063.5245             |
|    |        |                                                                                                                                                                   |           |                                                 |       | [M-H-rha] <sup>-</sup> 917.4686          |
| 39 | 44.082 | Ophiofurospiside K                                                                                                                                                | 1063.5245 | C <sub>50</sub> H <sub>80</sub> O <sub>24</sub> | 2.08  | [M-H-glc] <sup>-</sup> 901.4726          |
|    |        |                                                                                                                                                                   |           |                                                 |       | [M-H-glc-rha] <sup>-</sup> 755.4173      |
|    |        |                                                                                                                                                                   |           |                                                 |       | [M-H-2glc-rha] <sup>-</sup> 593.3647     |
|    |        |                                                                                                                                                                   |           |                                                 |       | [M-H-2glc-rha-xyl] <sup>-</sup> 461.2117 |
|    |        | (25 <i>S</i> )-26- <i>O</i> -β-D-glucopyranosyl-5β-furostane-3β,22α,26-triol-3- <i>O</i> -β-D-glucopyranosyl(1→2)-β-D-glucopyranoside                             | 919.4825  | C <sub>45</sub> H <sub>76</sub> O <sub>19</sub> | 4.54  | [M-H] <sup>-</sup> 919.4825              |
| 40 | 44.218 |                                                                                                                                                                   |           |                                                 |       | [M-H-glc] <sup>-</sup> 757.4384          |
|    |        |                                                                                                                                                                   |           |                                                 |       | [M-H-2glc] <sup>-</sup> 595.3910         |
|    |        |                                                                                                                                                                   |           |                                                 |       | [M-H-3glc] <sup>-</sup> 433.3267         |
|    |        | (25 <i>S</i> )-26- <i>O</i> -β-D-glucopyranosyl-5β-furostane-3β,22α,26-triol-3- <i>O</i> -β-D-glucopyranosyl(1→4)-β-D-glucopyranoside                             | 919.4951  | C <sub>45</sub> H <sub>76</sub> O <sub>19</sub> | 1.71  | [M-H] <sup>-</sup> 919.4951              |
| 41 | 45.500 |                                                                                                                                                                   |           |                                                 |       | [M-H-glc] <sup>-</sup> 757.4414          |
|    |        |                                                                                                                                                                   |           |                                                 |       | [M-H-2glc] <sup>-</sup> 595.3980         |
|    |        | (25 <i>S</i> )-26- <i>O</i> -β-D-glucopyranosyl-5β-furostane-3β,22α,26-triol-3- <i>O</i> -α-L-rhamnopyranosyl(1→4)-[α-L-rhamnopyranosyl(1→2)]-β-D-glucopyranoside | 1049.5546 | C <sub>51</sub> H <sub>86</sub> O <sub>22</sub> | 0.47  | [M-H] <sup>-</sup> 1049.5546             |
| 42 | 54.210 |                                                                                                                                                                   |           |                                                 |       | [M-H-rha] <sup>-</sup> 903.4890          |
|    |        |                                                                                                                                                                   |           |                                                 |       | [M-H-2rha] <sup>-</sup> 757.4714         |
|    |        |                                                                                                                                                                   |           |                                                 |       | [M-H-2rha-glc] <sup>-</sup> 595.3870     |
|    |        |                                                                                                                                                                   |           |                                                 |       | [M-H-2rha-2glc] <sup>-</sup> 433.3451    |

|    |        |                                                                                                                                                                                                                                                             |           |                                                 |       |                                          |
|----|--------|-------------------------------------------------------------------------------------------------------------------------------------------------------------------------------------------------------------------------------------------------------------|-----------|-------------------------------------------------|-------|------------------------------------------|
| 43 | 55.966 | Ophiopogonin I'                                                                                                                                                                                                                                             | 1061.5069 | C <sub>51</sub> H <sub>82</sub> O <sub>23</sub> | -3.47 | [M-H] <sup>-</sup> 1061.5069             |
|    |        |                                                                                                                                                                                                                                                             |           |                                                 |       | [M-H-rha] <sup>-</sup> 915.4678          |
|    |        |                                                                                                                                                                                                                                                             |           |                                                 |       | [M-H-glc] <sup>-</sup> 899.4633          |
|    |        |                                                                                                                                                                                                                                                             |           |                                                 |       | [M-H-glc-rha] <sup>-</sup> 753.4092      |
|    |        |                                                                                                                                                                                                                                                             |           |                                                 |       | [M-H-glc-rha-glc] <sup>-</sup> 591.2696  |
| 44 | 57.417 | 26- <i>O</i> - $\beta$ -D-glucopyranosyl (25 <i>S</i> )-furost-5-ene-1 $\beta$ ,3 $\beta$ -22 $\alpha$ ,26-tetraol 1- <i>O</i> - $\beta$ -D-xylopyranosyl-(1 $\rightarrow$ 3)-[ $\alpha$ -L-rhamnopyranosyl-(1 $\rightarrow$ 2)]- $\beta$ -D-fucopyranoside | 1033.4885 | C <sub>50</sub> H <sub>82</sub> O <sub>22</sub> | -2.83 | [M-H-glc-rha-2glc] <sup>-</sup> 429.3987 |
|    |        |                                                                                                                                                                                                                                                             |           |                                                 |       | [M-H] <sup>-</sup> 1033.4885             |
|    |        |                                                                                                                                                                                                                                                             |           |                                                 |       | [M-H-xyl] <sup>-</sup> 901.4461          |
|    |        |                                                                                                                                                                                                                                                             |           |                                                 |       | [M-H-rha] <sup>-</sup> 887.4437          |
|    |        |                                                                                                                                                                                                                                                             |           |                                                 |       | [M-H-xyl-rha] <sup>-</sup> 755.3976      |
| 45 | 57.485 | Protodioscin                                                                                                                                                                                                                                                | 1047.5385 | C <sub>51</sub> H <sub>84</sub> O <sub>22</sub> | -1.5  | [M-H-xyl-rha-glc] <sup>-</sup> 593.3445  |
|    |        |                                                                                                                                                                                                                                                             |           |                                                 |       | [M-H-xyl-rha-2glc] <sup>-</sup> 431.3042 |
|    |        |                                                                                                                                                                                                                                                             |           |                                                 |       | [M-H] <sup>-</sup> 1047.5385             |
|    |        |                                                                                                                                                                                                                                                             |           |                                                 |       | [M-H-rha] <sup>-</sup> 901.4844          |
|    |        |                                                                                                                                                                                                                                                             |           |                                                 |       | [M-H-2rha] <sup>-</sup> 755.4261         |
| 46 | 58.666 | (25 <i>S</i> )-26- <i>O</i> - $\beta$ -D-glucopyranosyl-furostan-5-ene-3 $\beta$ ,26-diol-3- <i>O</i> - $\beta$ -D-xylopyranosyl-(1 $\rightarrow$ 4)-[ $\beta$ -D-glucopyranosyl-(1 $\rightarrow$ 2)]- $\beta$ -D-glucopyranoside                           | 1033.5246 | C <sub>49</sub> H <sub>78</sub> O <sub>23</sub> | -0.88 | [M-H-2rha-glc] <sup>-</sup> 593.3775     |
|    |        |                                                                                                                                                                                                                                                             |           |                                                 |       | [M-H-2rha-2glc] <sup>-</sup> 431.3259    |
|    |        |                                                                                                                                                                                                                                                             |           |                                                 |       | [M-H] <sup>-</sup> 1033.5246             |
|    |        |                                                                                                                                                                                                                                                             |           |                                                 |       | [M-H-xyl] <sup>-</sup> 901.4807          |
|    |        |                                                                                                                                                                                                                                                             |           |                                                 |       | [M-H-xyl-rha] <sup>-</sup> 755.4238      |
|    |        |                                                                                                                                                                                                                                                             |           |                                                 |       | [M-H-xyl-rha-glc] <sup>-</sup> 593.3721  |
|    |        |                                                                                                                                                                                                                                                             |           |                                                 |       | [M-H-xyl-rha-2glc] <sup>-</sup> 431.3137 |

|    |        |                                                                                                                                                                                                                                                        |           |                                                 |       |                                                                                                                                                                                                  |
|----|--------|--------------------------------------------------------------------------------------------------------------------------------------------------------------------------------------------------------------------------------------------------------|-----------|-------------------------------------------------|-------|--------------------------------------------------------------------------------------------------------------------------------------------------------------------------------------------------|
| 47 | 58.970 | (25 <i>S</i> )-26- <i>O</i> - $\beta$ -D-glucopyranosyl-5 $\beta$ -furostane-3 $\beta$ ,22 $\alpha$ ,26-triol-3- <i>O</i> - $\alpha$ -L-rhamnopyranosyl(1 $\rightarrow$ 4)-[ $\beta$ -D-xylopyranosyl (1 $\rightarrow$ 2)]- $\beta$ -D-glucopyranoside | 1035.5381 | C <sub>50</sub> H <sub>84</sub> O <sub>22</sub> | -0.84 | [M-H] <sup>-</sup> 1035.5381<br>[M-H-xyl] <sup>-</sup> 903.4988<br>[M-H-xyl-rha] <sup>-</sup> 757.4381<br>[M-H-xyl-rha-glc] <sup>-</sup> 595.3811<br>[M-H-xyl-rha-glc-glc] <sup>-</sup> 433.3308 |
| 48 | 59.578 | (25 <i>R</i> )-26- <i>O</i> - $\beta$ -D-glucopyranosyl-furost-5-ene-3 $\beta$ ,22 $\alpha$ ,26-triol-3- <i>O</i> - $\alpha$ -L-rhamnopyranosyl(1 $\rightarrow$ 2)- <i>O</i> - $\beta$ -D-glucopyranoside                                              | 901.4724  | C <sub>45</sub> H <sub>74</sub> O <sub>18</sub> | -2.64 | [M-H] <sup>-</sup> 901.4724<br>[M-H-rha] <sup>-</sup> 755.4198<br>[M-H-rha-glc] <sup>-</sup> 593.3671<br>[M-H-rha-2glc] <sup>-</sup> 431.3198                                                    |
| 49 | 60.321 | (25 <i>S</i> )-26- <i>O</i> - $\beta$ -D-glucopyranosyl-5ene-furostan-3 $\beta$ ,22 $\alpha$ ,26-triol-3- <i>O</i> - $\alpha$ -L-rhamnopyranosyl-(1 $\rightarrow$ 4)- $\beta$ -D-glucopyranoside or aspachioside D                                     | 901.4814  | C <sub>45</sub> H <sub>74</sub> O <sub>18</sub> | -1.06 | [M-H] <sup>-</sup> 901.4814<br>[M-H-rha] <sup>-</sup> 755.4200<br>[M-H-rha-glc] <sup>-</sup> 593.3880<br>[M-H-rha-glc-glc] <sup>-</sup> 431.0345                                                 |
| 50 | 60.996 | (25 <i>S</i> )-26- <i>O</i> - $\beta$ -D-glucopyranosyl-5 $\beta$ -furostan-3 $\beta$ ,22 $\alpha$ ,26-triol-3- <i>O</i> - $\alpha$ -L-rhamnopyranosyl-(1 $\rightarrow$ 4)- $\beta$ -D-glucopyranoside                                                 | 903.4960  | C <sub>45</sub> H <sub>76</sub> O <sub>18</sub> | -1.03 | [M-H] <sup>-</sup> 903.4960<br>[M-H-rha] <sup>-</sup> 757.4386<br>[M-H-rha-glc] <sup>-</sup> 595.4011<br>[M-H-rha-glc-glc] <sup>-</sup> 433.3317                                                 |

|    |        |                                                                                                                                                                                                        |           |                                                 |       |                                                                                                                                                   |
|----|--------|--------------------------------------------------------------------------------------------------------------------------------------------------------------------------------------------------------|-----------|-------------------------------------------------|-------|---------------------------------------------------------------------------------------------------------------------------------------------------|
| 51 | 61.840 | (25 <i>S</i> )-26- <i>O</i> - $\beta$ -D-glucopyranosyl-5 $\beta$ -furostan-3 $\beta$ ,22 $\alpha$ ,26-triol-3- <i>O</i> - $\alpha$ -L-rhamnopyranosyl-(1 $\rightarrow$ 2)- $\beta$ -D-glucopyranoside | 903.4974  | C <sub>45</sub> H <sub>76</sub> O <sub>18</sub> | -1.58 | [M-H] <sup>+</sup> 903.4974<br>[M-H-rha] <sup>+</sup> 757.4403<br>[M-H-rha-glc] <sup>+</sup> 595.3859<br>[M-H-rha-glc-glc] <sup>+</sup> 433.3253  |
| 52 | 62.751 | (25 <i>S</i> )-26- <i>O</i> - $\beta$ -D-glucopyranosyl-5 $\beta$ -furostan-3 $\beta$ ,22 $\alpha$ ,26-triol-3- <i>O</i> - $\beta$ -D-xylopyranosyl-(1 $\rightarrow$ 4)- $\beta$ -D-glucopyranoside    | 889.4820  | C <sub>44</sub> H <sub>74</sub> O <sub>18</sub> | -1.30 | [M-H] <sup>+</sup> 889.4820<br>[M-H-xyl] <sup>+</sup> 757.4407<br>[M-H-xyl-glc] <sup>+</sup> 595.3835<br>[M-H-xyl-glc-glc] <sup>+</sup> 433.3332  |
| 53 | 63.123 | Prazerigenin A-3- <i>O</i> - $\alpha$ -L-rhamnopyranosyl (1 $\rightarrow$ 2)- $\beta$ -D-xylopyranosyl(1 $\rightarrow$ 3)]- $\beta$ -D-glucopyranosyl(1 $\rightarrow$ 4)]- $\beta$ -D-glucopyranoside  | 1031.4995 | C <sub>50</sub> H <sub>78</sub> O <sub>22</sub> | 2.52  | [M-H] <sup>+</sup> 1031.4995<br>[M-H-xyl] <sup>+</sup> 899.4579<br>[M-H-xyl-rha] <sup>+</sup> 753.4088<br>[M-H-xyl-rha-glc] <sup>+</sup> 591.3339 |
| 54 | 64.034 | Pennogenin 3- <i>O</i> - $\alpha$ -L-rhamnopyranosyl (1 $\rightarrow$ 2)- $\beta$ -D-glucopyranosyl(1 $\rightarrow$ 3)]- <i>O</i> - $\beta$ -D-glucopyranoside                                         | 899.4590  | C <sub>45</sub> H <sub>72</sub> O <sub>18</sub> | -3.26 | [M-H] <sup>+</sup> 899.4590<br>[M-H-rha] <sup>+</sup> 753.3954<br>[M-H-glc] <sup>+</sup> 737.4073<br>[M-H-glc-rha] <sup>+</sup> 591.4958          |

|    |        |                                                                                                                                                                                                                                                                  |           |                                                 |       |                                                                                                                                                                                                                                                                     |
|----|--------|------------------------------------------------------------------------------------------------------------------------------------------------------------------------------------------------------------------------------------------------------------------|-----------|-------------------------------------------------|-------|---------------------------------------------------------------------------------------------------------------------------------------------------------------------------------------------------------------------------------------------------------------------|
| 55 | 65.114 | Ruscogenin 3- <i>O</i> - $\alpha$ -L-rhamnopyranosyl<br>(1 $\rightarrow$ 2)-[ $\beta$ -D-glucopyranosyl (1 $\rightarrow$ 3)]- <i>O</i> - $\beta$ -<br>D-glucopyranoside                                                                                          | 899.4528  | C <sub>45</sub> H <sub>72</sub> O <sub>18</sub> | 1.96  | [M-H] <sup>+</sup> 899.4528<br>[M-H-rha] <sup>+</sup> 753.3734<br>[M-H-glc] <sup>+</sup> 737.4015<br>[M-H-glc-rha] <sup>+</sup> 591.3480                                                                                                                            |
| 56 | 67.714 | (25 <i>R</i> )-26- <i>O</i> - $\beta$ -D-glucopyranosyl-furost-5-<br>ene-3 $\beta$ ,22 $\alpha$ ,26-triol-3- <i>O</i> -[ $\alpha$ -L-<br>rhamnopyranosyl (1 $\rightarrow$ 2)]- $\beta$ -D-<br>xylopyranosyl(1 $\rightarrow$ 4)]- $\beta$ -D-<br>glucopyranoside  | 1033.5298 | C <sub>50</sub> H <sub>82</sub> O <sub>22</sub> | -1.38 | [M-H] <sup>+</sup> 1033.5298<br>[M-H-xy] <sup>+</sup> 901.4834<br>[M-H-glc-xy] <sup>+</sup> 739.4498                                                                                                                                                                |
| 57 | 69.233 | (25 <i>R</i> )-26- <i>O</i> - $\beta$ -D-glucopyranosyl-furost-<br>5,20-diene-3 $\beta$ ,26-diol-3- <i>O</i> - $\beta$ -D-<br>glucopyranosyl(1 $\rightarrow$ 6)-[ $\alpha$ -L-<br>rhamnopyranosyl(1 $\rightarrow$ 2)]- <i>O</i> - $\beta$ -D-<br>glucopyranoside | 1045.5260 | C <sub>44</sub> H <sub>86</sub> O <sub>27</sub> | 2.27  | [M-H] <sup>+</sup> 1045.5260<br>[M-H-glc] <sup>+</sup> 883.4642<br>[M-H-glc-rha] <sup>+</sup> 737.4057<br>[M-H-glc-rha-glc] <sup>+</sup> 575.3561<br>[M-H-2glc-rha-H <sub>2</sub> O] <sup>+</sup> 557.3468<br>[M-H-3glc-rha-H <sub>2</sub> O] <sup>+</sup> 395.0246 |
| 58 | 69.469 | (25 <i>R</i> )-26- <i>O</i> - $\beta$ -D-glucopyranosyl-furost-5-<br>ene-3 $\beta$ ,22 $\alpha$ ,26-triol-3- <i>O</i> - $\beta$ -D-<br>glucopyranosyl(1 $\rightarrow$ 6)-[ $\alpha$ -L-<br>rhamnopyranosyl(1 $\rightarrow$ 2)]- $\beta$ -D-<br>glucopyranoside   | 1053.5308 | C <sub>53</sub> H <sub>82</sub> O <sub>21</sub> | -3.05 | [M-H] <sup>+</sup> 1053.5308<br>[M-H-glc] <sup>+</sup> 891.4694<br>[M-H-glc-rha] <sup>+</sup> 745.4118<br>[M-H-2glc-rha] <sup>+</sup> 583.3622<br>[M-H-2glc-rha-H <sub>2</sub> O] <sup>+</sup> 565.3471<br>[M-H-3glc-rha-H <sub>2</sub> O] <sup>+</sup> 403.4808    |

|    |        |                                                                                                                                                                                                                                                     |           |                                                 |       |                                                                                                                                                                                         |
|----|--------|-----------------------------------------------------------------------------------------------------------------------------------------------------------------------------------------------------------------------------------------------------|-----------|-------------------------------------------------|-------|-----------------------------------------------------------------------------------------------------------------------------------------------------------------------------------------|
| 59 | 69.740 | (25S)-26- <i>O</i> - $\beta$ -D-glucopyranosyl-5 $\beta$ -furostan-20(22)-ene-3 $\beta$ ,26-diol-3- <i>O</i> - $\beta$ -D-xylopyranosyl(1 $\rightarrow$ 4)-[ $\beta$ -D-glucopyranosyl(1 $\rightarrow$ 2)]- $\beta$ -D-glucopyranoside              | 1033.4873 | C <sub>49</sub> H <sub>78</sub> O <sub>23</sub> | -1.15 | [M-H] <sup>-</sup> 1033.4873<br>[M-H-xyl] <sup>-</sup> 901.4506<br>[M-H-xyl-glc] <sup>-</sup> 739.4035<br>[M-H-xyl-2glc] <sup>-</sup> 577.3435                                          |
| 60 | 69.807 | (25S)-Spirostan-3 $\beta$ ,17 $\alpha$ -diol-3- <i>O</i> - $\beta$ -D-glucopyranosyl(1 $\rightarrow$ 2)-[ $\beta$ -D-xylopyranosyl(1 $\rightarrow$ 4)]- <i>O</i> - $\beta$ -D-glucopyranoside                                                       | 887.4654  | C <sub>44</sub> H <sub>72</sub> O <sub>18</sub> | -0.91 | [M-H] <sup>-</sup> 887.4654;<br>[M-H-xyl] <sup>-</sup> 755.3968;<br>[M-H-xyl-glc] <sup>-</sup> 593.3548                                                                                 |
| 61 | 70.111 | 5,7,2'-trihydroxy-3'5'-dimethoxy-6,8-dimethylhomoisoflavanone                                                                                                                                                                                       | 373.1879  | C <sub>20</sub> H <sub>21</sub> O <sub>7</sub>  | -0.9  | [M-H] <sup>-</sup> 373.1879<br>[M-H-B-ring-OCH <sub>3</sub> ] <sup>-</sup> 207.0289                                                                                                     |
| 62 | 70.178 | (25S)-26- <i>O</i> - $\beta$ -D-glucopyranosyl-5 $\beta$ -furostan-20(22)-ene-3 $\beta$ ,26-diol-3- <i>O</i> - $\beta$ -D-xylopyranosyl(1 $\rightarrow$ 3)-[ $\beta$ -D-glucopyranosyl(1 $\rightarrow$ 2)]- $\beta$ -D-galactopyranoside            | 1033.4903 | C <sub>49</sub> H <sub>78</sub> O <sub>23</sub> | -0.66 | [M-H] <sup>-</sup> 1033.4903<br>[M-H-xyl] <sup>-</sup> 901.4528<br>[M-H-xyl-glc] <sup>-</sup> 739.4050<br>[M-H-xyl-glc-Gla] <sup>-</sup> 577.3624                                       |
| 63 | 70.516 | (25S)26- <i>O</i> - $\beta$ -D-glucopyranosyl-5 $\beta$ -furostan-5-ene-3 $\beta$ ,22 $\alpha$ ,26-triol-3- <i>O</i> - $\alpha$ -L-rhamnopyranosyl(1 $\rightarrow$ 2)-[ $\alpha$ -L-rhamnopyranosyl(1 $\rightarrow$ 4)]- $\beta$ -D-glucopyranoside | 1047.5383 | C <sub>51</sub> H <sub>84</sub> O <sub>22</sub> | -0.91 | [M-H] <sup>-</sup> 1047.5383<br>[M-H-rha] <sup>-</sup> 901.4835<br>[M-H-rha-glc] <sup>-</sup> 739.4331<br>[M-H-rha-2glc] <sup>-</sup> 577.3804<br>[M-H-2rha-2glc] <sup>-</sup> 431.4627 |
| 64 | 71.259 | (25S)26- <i>O</i> - $\beta$ -D-glucopyranosyl-5 $\beta$ -furostan-20(22)-ene-3 $\beta$ ,26-diol-3- <i>O</i> - $\beta$ -D-glucopyranosyl(1 $\rightarrow$ 2)- $\beta$ -D-glucopyranoside                                                              | 901.4811  | C <sub>45</sub> H <sub>74</sub> O <sub>18</sub> | -1.06 | [M-H] <sup>-</sup> 901.4811<br>[M-H-glc] <sup>-</sup> 739.4278<br>[M-H-2glc] <sup>-</sup> 577.3693                                                                                      |

|    |        |                                                                                                                                                                                                                                                |           |                                                 |       |                                                                                                                                                      |
|----|--------|------------------------------------------------------------------------------------------------------------------------------------------------------------------------------------------------------------------------------------------------|-----------|-------------------------------------------------|-------|------------------------------------------------------------------------------------------------------------------------------------------------------|
| 65 | 71.360 | (25 <i>S</i> )-Spirostan-3 $\beta$ ,17 $\alpha$ -diol-3- <i>O</i> - $\beta$ -D-glucopyranosyl(1 $\rightarrow$ 2)- <i>O</i> - $\beta$ -D-glucopyranoside                                                                                        | 755.4265  | C <sub>39</sub> H <sub>64</sub> O <sub>14</sub> | -1.18 | [M-H] <sup>-</sup> 755.4265<br>[M-H-glc] <sup>-</sup> 593.3680                                                                                       |
| 66 | 72.001 | (25 <i>S</i> )26- <i>O</i> - $\beta$ -D-glucopyranosyl-5 $\beta$ -furost-20(22)-ene-3 $\beta$ ,26-diol-3- <i>O</i> - $\alpha$ -L-rhamnopyranosyl(1 $\rightarrow$ 4)-[ $\beta$ -D-xylopyranosyl(1 $\rightarrow$ 2)]- $\beta$ -D-glucopyranoside | 1017.5294 | C <sub>50</sub> H <sub>82</sub> O <sub>21</sub> | 0.16  | [M-H] <sup>-</sup> 1017.5294<br>[M-H-xyl] <sup>-</sup> 885.4877<br>[M-H-xyl-rha] <sup>-</sup> 793.4345<br>[M-H-xyl-rha-glc] <sup>-</sup> 577.3822    |
| 67 | 72.035 | 5,3',4'-trihydroxy-7-methoxy-8-methyl homoisoflavanone                                                                                                                                                                                         | 329.2315  | C <sub>18</sub> H <sub>18</sub> O <sub>6</sub>  | 1.66  | [M-H] <sup>-</sup> 329.2315<br>[M-H-CO] <sup>-</sup> 301.1138<br>[M-H-2H <sub>2</sub> O] <sup>-</sup> 293.2210<br>[M-H-B-ring] <sup>-</sup> 211.1341 |
| 68 | 72.407 | (25 <i>S</i> )26- <i>O</i> - $\beta$ -D-glucopyranosyl-5 $\beta$ -furost-5,20-diene-3 $\beta$ ,26-diol-3- <i>O</i> - $\alpha$ -L-rhamnopyranosyl(1 $\rightarrow$ 4)-[ $\beta$ -D-xylopyranosyl(1 $\rightarrow$ 3)]- $\beta$ -D-glucopyranoside | 1015.5113 | C <sub>43</sub> H <sub>84</sub> O <sub>26</sub> | 1.46  | [M-H] <sup>-</sup> 1015.5113;<br>[M-xyl-H] <sup>-</sup> 883.4802;<br>[M-xyl-rha-H] <sup>-</sup> 737.4323;<br>[M-xyl-rha-glc-H] <sup>-</sup> 575.3451 |
| 69 | 72.474 | 5,7,4'-trihydroxy-3',5'-dimethoxy-8-methylhomoisoflavanone                                                                                                                                                                                     | 329.233   | C <sub>20</sub> H <sub>26</sub> O <sub>4</sub>  | -3.93 | [M-H] <sup>-</sup> 329.233<br>[M-H-H <sub>2</sub> O] <sup>-</sup> 311.2220<br>[M-H-2H <sub>2</sub> O] <sup>-</sup> 293.2197                          |

|    |        |                                                                                                                                                                                                 |           |                                                 |       |                                                                                                                                                                                                     |
|----|--------|-------------------------------------------------------------------------------------------------------------------------------------------------------------------------------------------------|-----------|-------------------------------------------------|-------|-----------------------------------------------------------------------------------------------------------------------------------------------------------------------------------------------------|
| 70 | 72.778 | Pseudo-protodioscin                                                                                                                                                                             | 1029.5208 | C <sub>51</sub> H <sub>82</sub> O <sub>21</sub> | 0.84  | [M-H] <sup>-</sup> 1029.5208;<br>[M-H-rha] <sup>-</sup> 883.4624;<br>[M-H-2rha] <sup>-</sup> 737.4122;<br>[M-H-2rha-glc] <sup>-</sup> 575.3586                                                      |
| 71 | 73.115 | Ophiopogenin-3-O- $\alpha$ -L-rhamnopyranosyl-(1 $\rightarrow$ 2)- $\beta$ -D-glucopyranosyl-(1 $\rightarrow$ 3)- $\beta$ -D-glucopyranoside                                                    | 915.4512  | C <sub>45</sub> H <sub>72</sub> O <sub>19</sub> | -2.31 | [M-H] <sup>-</sup> 915.4512<br>[M-H-rha] <sup>-</sup> 769.3919<br>[M-H-glc] <sup>-</sup> 753.4037<br>[M-H-glc-rha] <sup>-</sup> 607.3326<br>[M-H-2glc-rha] <sup>-</sup> 445.2798                    |
| 72 | 73.419 | (25 <i>S</i> )-3 $\beta$ -spirostan-3-ol-3- <i>O</i> - $\beta$ -D-glucopyranosyl(1 $\rightarrow$ 2)-[ $\beta$ -D-xylopyranosyl(1 $\rightarrow$ 4)]- $\beta$ -D-glucopyranoside                  | 871.4691  | C <sub>44</sub> H <sub>72</sub> O <sub>17</sub> | 0.66  | [M-H] <sup>-</sup> 871.4691;<br>[M-H-xyl] <sup>-</sup> 739.4264;<br>[M-H-xyl-glc] <sup>-</sup> 577.3695<br>[M-H-xyl-glc-glc] <sup>-</sup> 415.1084                                                  |
| 73 | 73.487 | (25 <i>S</i> )-26- <i>O</i> - $\beta$ -D-glucopyranosyl-5 $\beta$ -furost-20(22)-en-3 $\beta$ ,26-diol-3- <i>O</i> - $\alpha$ -L-rhamnopyranosyl(1 $\rightarrow$ 4)- $\beta$ -D-glucopyranoside | 885.4855  | C <sub>45</sub> H <sub>74</sub> O <sub>17</sub> | -0.2  | [M-H] <sup>-</sup> 885.4855;<br>[M-H-xyl] <sup>-</sup> 739.4300;<br>[M-H-glc] <sup>-</sup> 577.3740                                                                                                 |
| 74 | 73.689 | Ophiopogonanone G'                                                                                                                                                                              | 375.1817  | C <sub>19</sub> H <sub>20</sub> O <sub>8</sub>  | 1.03  | [M-H] <sup>-</sup> 375.1817<br>[M-H-H <sub>2</sub> O] <sup>-</sup> 357.1725<br>[M-H-H <sub>2</sub> O-CO] <sup>-</sup> 329.5682<br>[M-H-B-ring-C <sub>2</sub> H <sub>5</sub> ] <sup>-</sup> 191.0750 |



|    |        |                                                                                                                                                                                  |          |                                                 |       |                                                                                                                                                                                                                           |
|----|--------|----------------------------------------------------------------------------------------------------------------------------------------------------------------------------------|----------|-------------------------------------------------|-------|---------------------------------------------------------------------------------------------------------------------------------------------------------------------------------------------------------------------------|
| 75 | 74.128 | (25S)-spirostan-3 $\beta$ ,17 $\alpha$ -diol-12-one-3-O- $\beta$ -D-glucopyranosyl(1 $\rightarrow$ 2)-[ $\beta$ -D-xylopyranosyl(1 $\rightarrow$ 4)]- $\beta$ -D-glucopyranoside | 915.4945 | C <sub>53</sub> H <sub>72</sub> O <sub>13</sub> | -1.97 | [M-H] <sup>+</sup> 915.4945<br>[M-H-glc] <sup>+</sup> 753.4320                                                                                                                                                            |
| 76 | 74.432 | 5,2'-Dihydroxy-7,8,4'-trimethoxy-6-methyl homoisoflavanone                                                                                                                       | 373.1300 | C <sub>20</sub> H <sub>22</sub> O <sub>7</sub>  | 2.08  | [M-H] <sup>+</sup> 373.1300<br>[M-H-CH <sub>3</sub> ] <sup>+</sup> 358.1077<br>[M-H-2CH <sub>3</sub> ] <sup>+</sup> 343.0811<br>[M-H-B-ring-OCH <sub>3</sub> ] <sup>+</sup> 207.0295                                      |
| 77 | 74.770 | (25R)-26-O- $\beta$ -D-glucopyranosyl-furost-5-ene-3 $\beta$ ,22 $\alpha$ ,26-triol-3-O- $\alpha$ -L-rhamnopyranosyl (1 $\rightarrow$ 6)-O- $\beta$ -D-glucopyranoside           | 901.4289 | C <sub>44</sub> H <sub>70</sub> O <sub>19</sub> | -2.18 | [M-H] <sup>+</sup> 901.4289<br>[M-H-xyl] <sup>+</sup> 769.3929<br>[M-H-xyl-rha] <sup>+</sup> 623.3359<br>[M-H-xyl-rha-H <sub>2</sub> O] <sup>+</sup> 605.3353<br>[M-H-xyl-rha-glc-H <sub>2</sub> O] <sup>+</sup> 433.2753 |
| 78 | 75.276 | Ophiopigonin R                                                                                                                                                                   | 769.4026 | C <sub>39</sub> H <sub>62</sub> O <sub>15</sub> | -3.23 | [M-H] <sup>+</sup> 769.4026<br>[M-H-xyl] <sup>+</sup> 623.3373<br>[M-H-xyl-glc] <sup>+</sup> 461.2898<br>[M-H] <sup>+</sup> 949.4605                                                                                      |
| 79 | 75.782 | Ophiofurospiside D                                                                                                                                                               | 949.4605 | C <sub>45</sub> H <sub>74</sub> O <sub>21</sub> | 4.27  | [M-H-rha] <sup>+</sup> 803.3452<br>[M-H-rha-glc] <sup>+</sup> 641.3524<br>[M-H-rha-2glc] <sup>+</sup> 479.3135                                                                                                            |
| 80 | 75.951 | (25S)-26-O- $\beta$ -D-glucopyranosyl-5 $\beta$ -furosta n-3 $\beta$ , 22 $\alpha$ , 26-triol                                                                                    | 595.3850 | C <sub>34</sub> H <sub>44</sub> O <sub>9</sub>  | -3.13 | [M-H] <sup>+</sup> 595.3850<br>[M-H-glc] <sup>+</sup> 433.3307                                                                                                                                                            |

|    |        |                                                                                                                                             |          |                                                      |       |                                                                                                                                                                                                       |
|----|--------|---------------------------------------------------------------------------------------------------------------------------------------------|----------|------------------------------------------------------|-------|-------------------------------------------------------------------------------------------------------------------------------------------------------------------------------------------------------|
| 81 | 76.052 | Cixi-ophiopogon C                                                                                                                           | 753.3998 | C <sub>39</sub> H <sub>62</sub> O <sub>14</sub>      | -2.49 | [M-H] <sup>-</sup> 753.3998<br>[M-H-rha] <sup>-</sup> 607.3604<br>[M-H-rha-glc] <sup>-</sup> 445.2974                                                                                                 |
| 82 | 76.930 | Ophiopogenin-3-O- $\alpha$ -L-rhamnopyranosyl-(1 $\rightarrow$ 2)- $\beta$ -D-xylopyranosyl-(1 $\rightarrow$ 3)- $\beta$ -D-glucopyranoside | 885.4389 | C <sub>44</sub> H <sub>70</sub> O <sub>18</sub>      | 4.72  | [M-H] <sup>-</sup> 885.4389<br>[M-H-xyl] <sup>-</sup> 753.3982<br>[M-H-xyl-rha] <sup>-</sup> 607.3376<br>[M-H-xyl-rha-glc] <sup>-</sup> 445.2937                                                      |
| 83 | 77.403 | Cixi-ophiopogon C                                                                                                                           | 753.3978 | C <sub>39</sub> H <sub>62</sub> O <sub>14</sub>      | -5.49 | [M-H] <sup>-</sup> 753.3978<br>[M-H-rha] <sup>-</sup> 607.3447<br>[M-H-rha-glc] <sup>-</sup> 445.2936                                                                                                 |
| 84 | 77.504 | (25R)-3 $\beta$ -[(O- $\beta$ -D-glucopyranosyl (1 $\rightarrow$ 4)- $\beta$ -D-galactopyranosyl)oxy]-5 $\beta$ -spirostan-12-one           | 753.4092 | C <sub>39</sub> H <sub>62</sub> O <sub>14</sub>      | 2.07  | [M-H] <sup>-</sup> 753.4092<br>[M-H-glc] <sup>-</sup> 591.3545<br>[M-H-glc-glc] <sup>-</sup> 429.5092                                                                                                 |
| 85 | 77.909 | Ruscogenin 1-O- $\alpha$ -L-rhamnopyranosyl-(1 $\rightarrow$ 2)-4-O-sulfo- $\beta$ -D-fucopyranosido-3-O- $\beta$ -D-glucopyranoside        | 963.4194 | C <sub>45</sub> H <sub>72</sub> O <sub>20</sub><br>S | -1.25 | [M-H] <sup>-</sup> 963.4194<br>[M-H-rha] <sup>-</sup> 817.3555<br>[M-H-glc] <sup>-</sup> 801.3481<br>[M-H-glc-rha] <sup>-</sup> 655.2110<br>[M-H-glc-rha-Fuc-SO <sub>3</sub> H] <sup>-</sup> 429.8510 |

|    |        |                                                                                                                                                     |          |                                                      |       |                                                                                                                                                                                                                                                                                                                 |
|----|--------|-----------------------------------------------------------------------------------------------------------------------------------------------------|----------|------------------------------------------------------|-------|-----------------------------------------------------------------------------------------------------------------------------------------------------------------------------------------------------------------------------------------------------------------------------------------------------------------|
| 86 | 79.124 | (25S)-5-ene-Spirostan-3 $\beta$ ,17 $\alpha$ -diol-3-O- $\beta$ -D-glucopyranosyl-(1 $\rightarrow$ 2)-O- $\beta$ -D-glucopyranoside                 | 753.4078 | C <sub>39</sub> H <sub>62</sub> O <sub>14</sub>      | -0.58 | [M-H] <sup>-</sup> 753.4078<br>[M-H-glc] <sup>-</sup> 591.3454<br>[M-H-2glc] <sup>-</sup> 429.3075                                                                                                                                                                                                              |
| 87 | 79.597 | 5,7,4'-Trihydroxy-3',5'-dimethoxy-6,8-dimethylhomoisoflavanone                                                                                      | 373.1316 | C <sub>20</sub> H <sub>22</sub> O <sub>7</sub>       | -3.21 | [M-H] <sup>-</sup> 373.1316<br>[M-H-2OCH <sub>3</sub> ] <sup>-</sup> 313.2354<br>[M-H-B-ring-CH <sub>2</sub> ] <sup>-</sup> 207.0667<br>[M-H-B-ring-CH <sub>2</sub> -CO] <sup>-</sup> 207.0651                                                                                                                  |
| 88 | 80.306 | Ruscogenin 1-O- $\alpha$ -L-rhamnopyranosyl-(1 $\rightarrow$ 2)-4-O-sulfate- $\alpha$ -L-arabinopyranoside                                          | 787.3615 | C <sub>38</sub> H <sub>60</sub> O <sub>15</sub><br>S | -2.56 | [M-H] <sup>-</sup> 787.3615                                                                                                                                                                                                                                                                                     |
| 89 | 80.610 | Ophiogenin 2-O-Acetyl- $\alpha$ -L-rhamnopyranosyl-(1 $\rightarrow$ 2)-O- $\beta$ -D-xylopyranosyl-(1 $\rightarrow$ 3)]- $\beta$ -D-glucopyranoside | 927.4522 | C <sub>46</sub> H <sub>72</sub> O <sub>19</sub>      | -3.14 | [M-H] <sup>-</sup> 927.4522<br>[M-H-C <sub>2</sub> H <sub>2</sub> O] <sup>-</sup> 885.4396<br>[M-H-C <sub>2</sub> H <sub>2</sub> O-xyl] <sup>-</sup> 753.4031<br>[M-H-C <sub>2</sub> H <sub>2</sub> O-xyl-rha] <sup>-</sup> 607.3399<br>[M-H-C <sub>2</sub> H <sub>2</sub> O-xyl-rha-glc] <sup>-</sup> 445.2891 |
| 90 | 81.015 | 5,4'-dihydroxy-7,3'-dimethoxy-8-methylhomoisoflavanone                                                                                              | 343.1173 | C <sub>19</sub> H <sub>20</sub> O <sub>6</sub>       | -1.49 | [M-H] <sup>-</sup> 343.1173<br>[M-H-B-ring-CH <sub>2</sub> ] <sup>-</sup> 207.0687,<br>[M-H-B-ring-C <sub>2</sub> H <sub>5</sub> ] <sup>-</sup> 193.0511,<br>[M-H-B-ring-CH <sub>2</sub> -CO] <sup>-</sup> 179.0712                                                                                             |

|    |        |                                                                                                                                                         |          |                                                 |       |                                                                                                                                                                                                                                                                          |
|----|--------|---------------------------------------------------------------------------------------------------------------------------------------------------------|----------|-------------------------------------------------|-------|--------------------------------------------------------------------------------------------------------------------------------------------------------------------------------------------------------------------------------------------------------------------------|
| 91 | 81.049 | 5,7-dihydroxy-6-methyl-3-(4'-hydroxybenzyl) chromone                                                                                                    | 297.0765 | C <sub>17</sub> H <sub>14</sub> O <sub>5</sub>  | -3.89 | [M-H] <sup>-</sup> 297.0765<br>[M-H-B-ring-H <sub>2</sub> O] <sup>-</sup> 175.0408<br>[M-B-ring-CH <sub>2</sub> ] <sup>-</sup> 204.0450                                                                                                                                  |
| 92 | 81.353 | Pennogenin 3- <i>O</i> - $\alpha$ -L-rhamnopyranosyl-(1 $\rightarrow$ 2)- $\beta$ -D-xylopyranosyl-(1 $\rightarrow$ 4)- $\beta$ -D-glucopyranoside      | 869.4487 | C <sub>37</sub> H <sub>74</sub> O <sub>22</sub> | 2.73  | [M-H] <sup>-</sup> 869.4487<br>[M-H-xyl] <sup>-</sup> 737.4060<br>[M-H-rha] <sup>-</sup> 723.3867<br>[M-H-xyl-rha] <sup>-</sup> 591.3589<br>[M-H-xyl-rha-glc] <sup>-</sup> 429.3136                                                                                      |
| 93 | 81.758 | Ophiopogonone C                                                                                                                                         | 353.1017 | C <sub>20</sub> H <sub>18</sub> O <sub>6</sub>  | -2.19 | [M-H] <sup>-</sup> 353.1017<br>[M-H-CH <sub>3</sub> ] <sup>-</sup> 338.0813<br>[M-H-CO] <sup>-</sup> 325.1073<br>[M-H-2CH <sub>3</sub> ] <sup>-</sup> 323.0823<br>[M-H-CH <sub>3</sub> -CO] <sup>-</sup> 310.0809<br>[M-H-B-ring-CH <sub>2</sub> ] <sup>-</sup> 193.0684 |
| 94 | 82.062 | Prazerigenin A 3- <i>O</i> - $\alpha$ -L-rhamnopyranosyl-(1 $\rightarrow$ 2)- $\beta$ -D-glucopyranoside                                                | 737.4031 | C <sub>39</sub> H <sub>62</sub> O <sub>13</sub> | -4.00 | [M-H] <sup>-</sup> 737.4031<br>[M-H-rha] <sup>-</sup> 591.3559<br>[M-H-rha-glc] <sup>-</sup> 429.2783                                                                                                                                                                    |
| 95 | 82.163 | (25S)-5-ene-Spirostan-3 $\beta$ ,17 $\alpha$ -diol-3- <i>O</i> - $\alpha$ -L-rhamnopyranosyl-(1 $\rightarrow$ 2)- <i>O</i> - $\beta$ -D-glucopyranoside | 737.4123 | C <sub>39</sub> H <sub>62</sub> O <sub>13</sub> | 2.5   | [M-H] <sup>-</sup> 737.4123<br>[M-H-rha] <sup>-</sup> 591.3551<br>[M-H-rha-glc] <sup>-</sup> 429.3047                                                                                                                                                                    |

|     |        |                                                                                                                                                                |          |                                                 |       |                                                                                                                                                                                                                                               |
|-----|--------|----------------------------------------------------------------------------------------------------------------------------------------------------------------|----------|-------------------------------------------------|-------|-----------------------------------------------------------------------------------------------------------------------------------------------------------------------------------------------------------------------------------------------|
| 96  | 82.568 | Ophiopogonanone E                                                                                                                                              | 359.1105 | C <sub>19</sub> H <sub>20</sub> O <sub>7</sub>  | -3.76 | [M-H] <sup>+</sup> 359.1105<br>[M-H-CH <sub>3</sub> ] <sup>+</sup> 344.0887<br>[M-H-B-ring-CH <sub>2</sub> ] <sup>+</sup> 193.0501<br>[M-H-B-ring-CH <sub>2</sub> -CO] <sup>+</sup> 165.0702                                                  |
| 97  | 82.635 | Prazerigenin A-3-O- $\alpha$ -L-rhamnopyranosyl-(1 $\rightarrow$ 3)- $\beta$ -D-xylopyranosyl-(1 $\rightarrow$ 4)- $\beta$ -D-glucopyranoside                  | 869.4487 | C <sub>37</sub> H <sub>74</sub> O <sub>22</sub> | 2.73  | [M-H] <sup>+</sup> 869.4487<br>[M-H-xyl] <sup>+</sup> 737.4060<br>[M-H-rha] <sup>+</sup> 723.3867<br>[M-H-xyl-rha] <sup>+</sup> 591.3589<br>[M-H-xyl-rha-glc] <sup>+</sup> 429.3136                                                           |
| 98  | 82.771 | (25 <i>S</i> )-17 $\alpha$ ,27-dihydroxyspirost-5-en-3 $\beta$ -yl O-(4-O-acetyl- $\alpha$ -L-rhamnopyranosyl)-(1 $\rightarrow$ 2)- $\beta$ -D-glucopyranoside | 795.3923 | C <sub>48</sub> H <sub>60</sub> O <sub>10</sub> | 0.06  | [M-H] <sup>+</sup> 795.3923<br>[M-H-Ac] <sup>+</sup> 753.4002<br>[M-H-Ac-H <sub>2</sub> O] <sup>+</sup> 735.3901                                                                                                                              |
| 99  | 82.906 | 5,7-dihydroxy-8,4'-dimethoxy-6-methyl homoisoflavanone                                                                                                         | 343.1172 | C <sub>19</sub> H <sub>20</sub> O <sub>6</sub>  | -5.49 | [M-H] <sup>+</sup> 343.1172<br>[M-H-B-ring-CH <sub>2</sub> ] <sup>+</sup> 207.0658<br>[M-H-B-ring-CH <sub>2</sub> -CO] <sup>+</sup> 179.0704                                                                                                  |
| 100 | 83.344 | 5,2'-dihydroxy-7,4'-dimethoxy-6,8-dimethylhomoisoflavanone                                                                                                     | 357.1325 | C <sub>20</sub> H <sub>22</sub> O <sub>6</sub>  | -4.85 | [M-H] <sup>+</sup> 357.1325<br>[M-H-CH <sub>3</sub> ] <sup>+</sup> 342.0961<br>[M-H-2CH <sub>3</sub> ] <sup>+</sup> 327.0878<br>[M-H-B-ring-CH <sub>2</sub> ] <sup>+</sup> 206.0571<br>[M-H-B-ring-CH <sub>2</sub> -CO] <sup>+</sup> 178.0619 |

|     |        |                                                                   |          |                                                  |       |                                                                                                                                                                                                                                                                                                      |
|-----|--------|-------------------------------------------------------------------|----------|--------------------------------------------------|-------|------------------------------------------------------------------------------------------------------------------------------------------------------------------------------------------------------------------------------------------------------------------------------------------------------|
| 101 | 83.615 | 1-O-sulfate-ruscogenin                                            | 509.2530 | C <sub>27</sub> H <sub>42</sub> O <sub>7</sub> S | 0.50  | [M-H] <sup>-</sup> 509.2530                                                                                                                                                                                                                                                                          |
| 102 | 83.885 | 3,5-dihydroxy-7,4'-dimethoxy-6-dimethylhomoisoflavanone           | 343.1189 | C <sub>19</sub> H <sub>20</sub> O <sub>6</sub>   | -2.49 | [M-H] <sup>-</sup> 343.1189<br>[M-H-H <sub>2</sub> O-OCH <sub>3</sub> ] <sup>-</sup> 297.1964,<br>[M-B-ring-H <sub>2</sub> O-CH <sub>2</sub> ] <sup>-</sup> 207.0654,<br>[M-B-ring-H <sub>2</sub> O-C <sub>3</sub> H <sub>3</sub> O] <sup>-</sup> 153.0553<br>[M-H] <sup>-</sup> 355.0815            |
| 103 | 84.323 | 5,7,2'-Trihydroxy-3',4'-methylenedioxy-6,8-dimethylhomoisoflavone | 355.0815 | C <sub>19</sub> H <sub>16</sub> O <sub>7</sub>   | -3.67 | [M-H-H <sub>2</sub> O] <sup>-</sup> 337.0683<br>[M-H-H <sub>2</sub> O-CO] <sup>-</sup> 309.0711<br>[M-H-B-ring-CH <sub>2</sub> ] <sup>-</sup> 205.0484<br>[M-H-B-ring-CH <sub>2</sub> -CO] <sup>-</sup> 177.0533<br>[M-H] <sup>-</sup> 341.1018                                                      |
| 104 | 84.661 | 5-hydroxy-3',4'-dimethoxy-6,8-dimethylhomoisoflavanone            | 341.1018 | C <sub>19</sub> H <sub>18</sub> O <sub>6</sub>   | -1.26 | [M-H-CH <sub>3</sub> ] <sup>-</sup> 326.0785<br>[M-H-2CH <sub>3</sub> ] <sup>-</sup> 311.0572<br>[M-B-ring-H <sub>2</sub> O-CH <sub>2</sub> ] <sup>-</sup> 207.0547<br>[M-B-ring-2H <sub>2</sub> O-CH <sub>2</sub> ] <sup>-</sup> 189.0545<br>[M-H-B-ring-CH <sub>2</sub> -CO] <sup>-</sup> 179.0334 |
| 105 | 85.066 | Ophiopigonin S                                                    | 723.3925 | C <sub>38</sub> H <sub>60</sub> O <sub>13</sub>  | 3.46  | [M-H] <sup>-</sup> 723.3925<br>[M-H-xyl] <sup>-</sup> 591.3611<br>[M-H-xyl-glc] <sup>-</sup> 429.3472                                                                                                                                                                                                |

|     |        |                                                                                                       |          |                                                 |       |                                                                                                                                                                                                                                                |
|-----|--------|-------------------------------------------------------------------------------------------------------|----------|-------------------------------------------------|-------|------------------------------------------------------------------------------------------------------------------------------------------------------------------------------------------------------------------------------------------------|
|     |        |                                                                                                       |          |                                                 |       | [M-H] <sup>+</sup> 911.4700<br>[M-H-AC] <sup>+</sup> 869.4524<br>[M-H-AC-H <sub>2</sub> O] <sup>+</sup> 851.4407<br>[M-H-AC-xyl] <sup>+</sup> 737.4049<br>[M-H-AC-xyl-rha] <sup>+</sup> 591.3665<br>[M-H-AC-xyl-rha-glc] <sup>+</sup> 429.2992 |
| 106 | 85.302 | Ophiopogonin A                                                                                        | 911.4700 | C <sub>39</sub> H <sub>76</sub> O <sub>23</sub> | 3.00  |                                                                                                                                                                                                                                                |
| 107 | 85.404 | (25S)-3β-[(O-α-L-rhamnopyranosyl-(1→2)-β-D-galactopyranosyl)oxy]-5β-spirostan-12-one                  | 737.4144 | C <sub>39</sub> H <sub>62</sub> O <sub>13</sub> | -0.35 | [M-H] <sup>+</sup> 737.4144                                                                                                                                                                                                                    |
| 108 | 86.484 | Prazerigenin A 3-O-[2-O-Acetyl-α-L-rhamnopyranosyl-(1→2)-β-D-glucopyranoside]                         | 779.3744 | C <sub>41</sub> H <sub>64</sub> O <sub>14</sub> | -4.22 | [M-H] <sup>+</sup> 779.3744<br>[M-H-2H <sub>2</sub> O] <sup>+</sup> 737.4038<br>[M-H-2H <sub>2</sub> O-rha] <sup>+</sup> 591.3275<br>[M-H-2H <sub>2</sub> O-rha-glc] <sup>+</sup> 429.2735                                                     |
| 109 | 86.653 | (25S)-3β-spirostan-3-ol-3-O-β-D-glucopyranosyl-(1→2)-[β-D-xylopyranosyl-(1→4)]-β-D-glucopyranoside    | 871.4683 | C <sub>44</sub> H <sub>72</sub> O <sub>17</sub> | -2.21 | [M-H] <sup>+</sup> 871.4683<br>[M-H-xyl] <sup>+</sup> 739.4220<br>[M-H-xyl-glc] <sup>+</sup> 577.3742                                                                                                                                          |
| 110 | 87.125 | (25S)-5β-spirostan-3β-ol-3-O-α-L-rhamnopyranosyl-(1→2)-[β-D-glucopyranosyl-(1→4)]-β-D-glucopyranoside | 885.4868 | C <sub>38</sub> H <sub>78</sub> O <sub>22</sub> | 3.25  | [M-H] <sup>+</sup> 885.4868<br>[M-H-rha] <sup>+</sup> 739.3975<br>[M-H-rha-glc] <sup>+</sup> 577.3876                                                                                                                                          |

|     |        |                                                                                                                                                                              |          |                                                 |        |                                                                                                                                                                                                                                                                                                                                                                                                                                                       |
|-----|--------|------------------------------------------------------------------------------------------------------------------------------------------------------------------------------|----------|-------------------------------------------------|--------|-------------------------------------------------------------------------------------------------------------------------------------------------------------------------------------------------------------------------------------------------------------------------------------------------------------------------------------------------------------------------------------------------------------------------------------------------------|
| 111 | 87.463 | Ophiopogonanone A                                                                                                                                                            | 328.0971 | C <sub>18</sub> H <sub>16</sub> O <sub>6</sub>  | -3.28  | [M-H] <sup>-</sup> 237.0863<br>[M-H-CH <sub>3</sub> ] <sup>-</sup> 313.2347,<br>[M-B-ring-CH <sub>2</sub> ] <sup>-</sup> 205.0513<br>[M-B-ring-C <sub>2</sub> H <sub>5</sub> ] <sup>-</sup> 192.0416<br>[M-H-CH <sub>3</sub> -H <sub>2</sub> O] <sup>-</sup> 297.0794,<br>[M-CH <sub>3</sub> -H <sub>2</sub> O-B-ring-CH <sub>2</sub> ] <sup>-</sup> 164.0467,<br>[M-C <sub>2</sub> H <sub>5</sub> -H <sub>2</sub> O-B-ring-CO] <sup>-</sup> 136.0159 |
| 112 | 87.767 | Prazerigenin A 3- <i>O</i> -[2- <i>O</i> -Acetyl- $\alpha$ -L-rhamnopyranosyl-(1 $\rightarrow$ 2)]- $\beta$ -D-xylopyranosyl-(1 $\rightarrow$ 4)- $\beta$ -D-glucopyranoside | 911.4588 | C <sub>46</sub> H <sub>72</sub> O <sub>18</sub> | -3.43, | [M-H] <sup>-</sup> 911.4588<br>[M-H-AC] <sup>-</sup> 869.4496<br>[M-H-AC-H <sub>2</sub> O] <sup>-</sup> 851.4404<br>[M-H-AC-xyl] <sup>-</sup> 737.4083<br>[M-H-AC-xyl-rha] <sup>-</sup> 591.3460<br>[M-H-AC-xyl-rha-glc] <sup>-</sup> 429.3096                                                                                                                                                                                                        |
| 113 | 88.543 | 5,7-dihydroxy-4'-methoxy-6-methyl homoisoflavanone                                                                                                                           | 313.1062 | C <sub>18</sub> H <sub>18</sub> O <sub>5</sub>  | 3.02   | [M-H] <sup>-</sup> 313.1062<br>[M-H-2CH <sub>3</sub> ] <sup>-</sup> 283.1251<br>[M-H-B-ring] <sup>-</sup> 207.0761<br>[M-H-B-ring-CH <sub>2</sub> ] <sup>-</sup> 192.0418<br>[M-H-B-ring-CH <sub>2</sub> -CO] <sup>-</sup> 164.0461<br>[M-H-B-ring-CH <sub>2</sub> -2CO] <sup>-</sup> 136.0169                                                                                                                                                        |



|     |        |                                                                                                                                 |          |                                                 |       |                                                                                                                                                                                            |
|-----|--------|---------------------------------------------------------------------------------------------------------------------------------|----------|-------------------------------------------------|-------|--------------------------------------------------------------------------------------------------------------------------------------------------------------------------------------------|
| 114 | 88.847 | (25S)-26-O- $\beta$ -D-glucopyranosyl-5 $\beta$ -furostan-3 $\beta$ , 22 $\alpha$ , 26-triol                                    | 595.2897 | C <sub>34</sub> H <sub>44</sub> O <sub>9</sub>  | -2.61 | [M-H] <sup>-</sup> 595.2897<br>[M-H-glc] <sup>-</sup> 433.2935                                                                                                                             |
| 115 | 89.083 | Pennogenin 3-O-[2-O-Acetyl- $\alpha$ -L-rhamno<br>pyranosyl-(1 $\rightarrow$ 2)- $\beta$ -D-glucopyranoside]                    | 799.4160 | C <sub>41</sub> H <sub>64</sub> O <sub>14</sub> | -4.22 | [M-H] <sup>-</sup> 799.4160<br>[M-H-2H <sub>2</sub> O] <sup>-</sup> 737.4053<br>[M-H-2H <sub>2</sub> O-rha] <sup>-</sup> 591.3284<br>[M-H-2H <sub>2</sub> O-rha-glc] <sup>-</sup> 429.2935 |
| 116 | 89.421 | (25S)-5 $\beta$ -spirostan-3 $\beta$ -ol-3-O- $\beta$ -D-<br>glucopyranosyl-(1 $\rightarrow$ 2)- $\beta$ -D-<br>glucopyranoside | 739.4273 | C <sub>39</sub> H <sub>64</sub> O <sub>13</sub> | -0.28 | [M-H] <sup>-</sup> 739.4273<br>[M-H-glc] <sup>-</sup> 577.3855<br>[M-H-2glc] <sup>-</sup> 415.3532                                                                                         |
| 117 | 90.603 | Ophiopogonin D                                                                                                                  | 853.4520 | C <sub>44</sub> H <sub>70</sub> O <sub>16</sub> | -5.05 | [M-H] <sup>-</sup> 853.4520<br>[M-H-xyl] <sup>-</sup> 721.4112<br>[M-H-rha] <sup>-</sup> 707.5198<br>[M-H]-xyl-rha <sup>-</sup> 575.3555<br>[M-H]-xyl-rha-Fuc <sup>-</sup> 413.4394        |
| 118 | 90.738 | Methylophiopogonone A                                                                                                           | 339.0862 | C <sub>19</sub> H <sub>16</sub> O <sub>6</sub>  | -2.20 | [M-H] <sup>-</sup> 339.0862<br>[M-H-CO] <sup>-</sup> 311.0917<br>[M-H-B-ring-CH <sub>2</sub> ] <sup>-</sup> 205.0484<br>[M-H-B-ring-CH <sub>2</sub> -CO] <sup>-</sup> 179.0349             |

|     |        |                         |          |                                                 |       |                                                        |
|-----|--------|-------------------------|----------|-------------------------------------------------|-------|--------------------------------------------------------|
|     |        |                         |          |                                                 |       | [M-H] <sup>-</sup> 853.4505                            |
| 119 | 92.156 | Ophiopogonin D'         | 853.4505 | C <sub>44</sub> H <sub>70</sub> O <sub>16</sub> | 1.48  | [M-H-xyl] <sup>-</sup> 721.4119                        |
|     |        |                         |          |                                                 |       | [M-H-rha] <sup>-</sup> 707.3851                        |
|     |        |                         |          |                                                 |       | [M-H]-xyl-rha <sup>-</sup> 575.3504                    |
|     |        |                         |          |                                                 |       | [M-H]-xyl-rha-glc <sup>-</sup> 413.2125                |
|     |        |                         |          |                                                 |       | [M-H] <sup>-</sup> 325.1110                            |
| 120 | 92.358 | Methylophiopogonone B   | 325.1110 | C <sub>19</sub> H <sub>18</sub> O <sub>5</sub>  | -1.75 | [M-H-CH <sub>3</sub> ] <sup>-</sup> 310.2103           |
|     |        |                         |          |                                                 |       | [M-H-B-ring-CH <sub>2</sub> ] <sup>-</sup> 205.0433    |
|     |        |                         |          |                                                 |       | [M-H-B-ring-CH <sub>2</sub> -CO] <sup>-</sup> 179.0346 |
|     |        |                         |          |                                                 |       | [M-H] <sup>-</sup> 341.1025                            |
| 121 | 92.763 | Methylophiopogonanone A | 341.1025 | C <sub>19</sub> H <sub>18</sub> O <sub>6</sub>  | 1.64  | [M-H-2CH <sub>3</sub> -CO] <sup>-</sup> 283.1336,      |
|     |        |                         |          |                                                 |       | [M-B-ring] <sup>-</sup> 220.0710,                      |
|     |        |                         |          |                                                 |       | [M-H-B-ring-CH <sub>2</sub> ] <sup>-</sup> 206.0567,   |
|     |        |                         |          |                                                 |       | [M-H-B-ring-CH <sub>2</sub> -CO] <sup>-</sup> 178.0626 |
|     |        |                         |          |                                                 |       | [M-H] <sup>-</sup> 327.1228                            |
| 122 | 94.755 | Methylophiopogonanone B | 327.1228 | C <sub>19</sub> H <sub>20</sub> O <sub>5</sub>  | -3.04 | [M-H-B-ring-CH <sub>2</sub> ] <sup>-</sup> 206.0581,   |
|     |        |                         |          |                                                 |       | [M-H-B-ring-CH <sub>2</sub> -CO] <sup>-</sup> 178.0621 |
|     |        |                         |          |                                                 |       | [M-H+COOH] <sup>-</sup> 767.4249                       |
| 123 | 95.869 | Ophiopogonin B          | 721.409  | C <sub>39</sub> H <sub>62</sub> O <sub>12</sub> | -3.56 | [M-H] <sup>-</sup> 721.4096                            |
|     |        |                         |          |                                                 |       | [M-H-rha] <sup>-</sup> 575.3523                        |
|     |        |                         |          |                                                 |       | [M-H] <sup>-</sup> 369.0944                            |
| 124 | 96.274 | Ophiopogonanone D       | 369.0944 | C <sub>20</sub> H <sub>18</sub> O <sub>7</sub>  | 1.66  | [M-H-CH <sub>3</sub> ] <sup>-</sup> 354.0760           |
|     |        |                         |          |                                                 |       | [M-H-B-ring-CH <sub>2</sub> ] <sup>-</sup> 205.0645    |
|     |        |                         |          |                                                 |       | [M-H-B-ring-CH <sub>2</sub> -CO] <sup>-</sup> 179.0316 |
